# Supplementary material
Source: HighWire-hosted journal article supplement (https://erj.ersjournals.com/content/58/2/2000752)
Supplement: inline-supplementary-material-2 [file inline-supplementary-material-2.pdf]

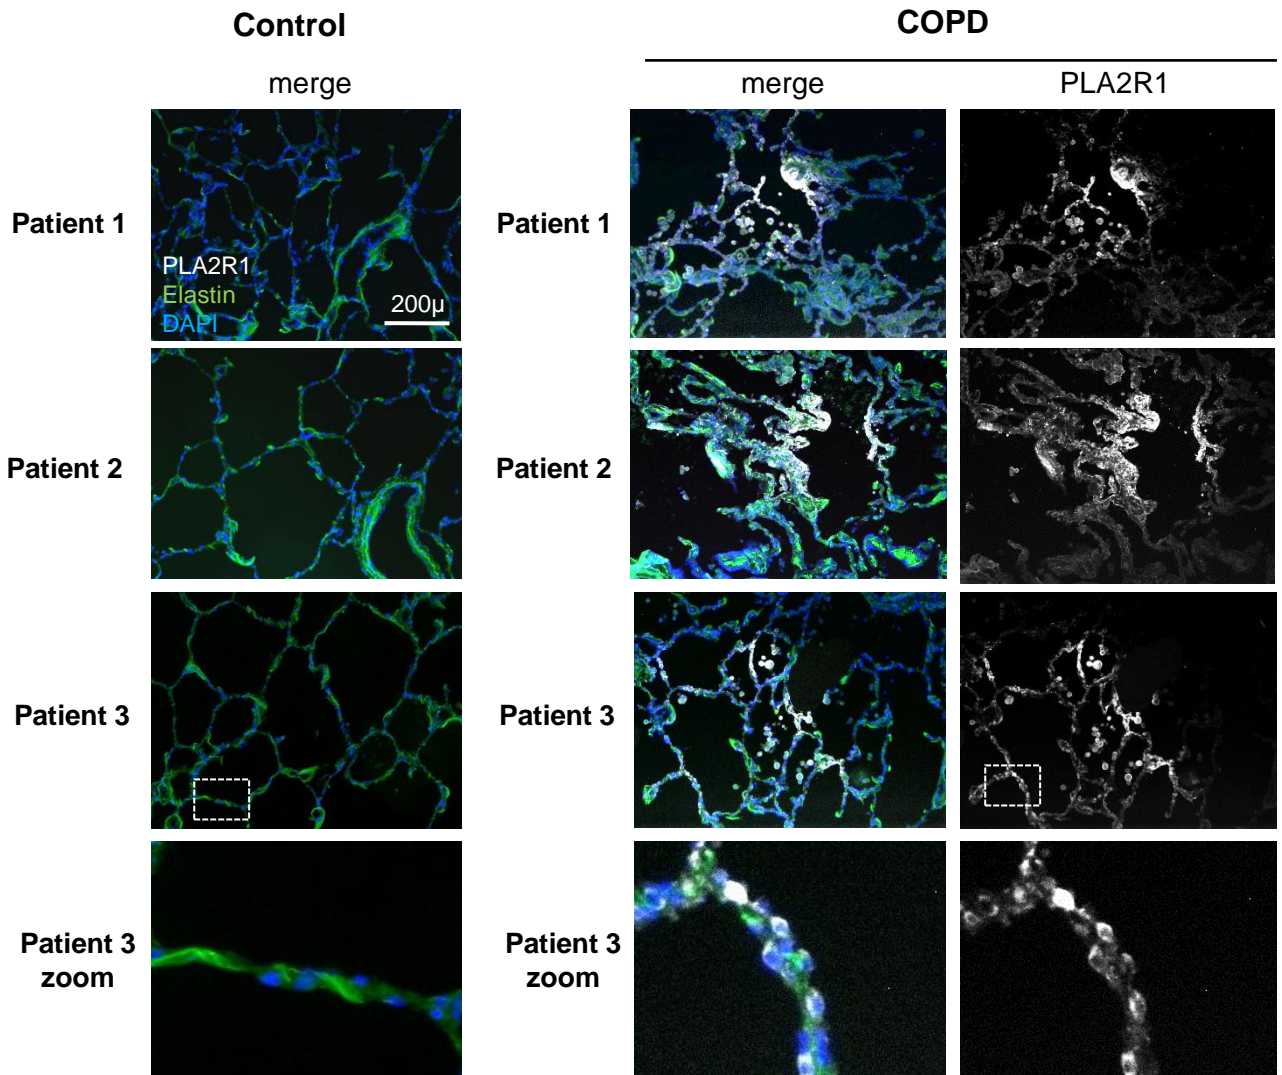**Supplemental Figure 1****Distribution of PLA2R1 immunofluorescence activity in lungs from patients with COPD and controls**

Representative micrographs of lung tissue from 3 patients with COPD and 3 controls showing PLA2R1 expression (white), and merge with elastin autofluorescence (green) and nuclear DAPI staining (blue). The zoom area is indicated by a square.

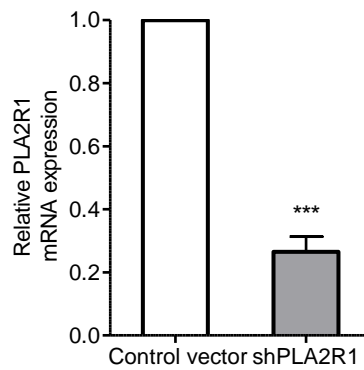

**Supplemental Figure 2:** *PLA2R1* mRNA levels measured in cells stably infected with the sh*PLA2R1*-encoding retroviral vector, compared to cells infected with the control vector. \*\*\* $P < 0.001$  for comparison between groups, Student's *t*-test

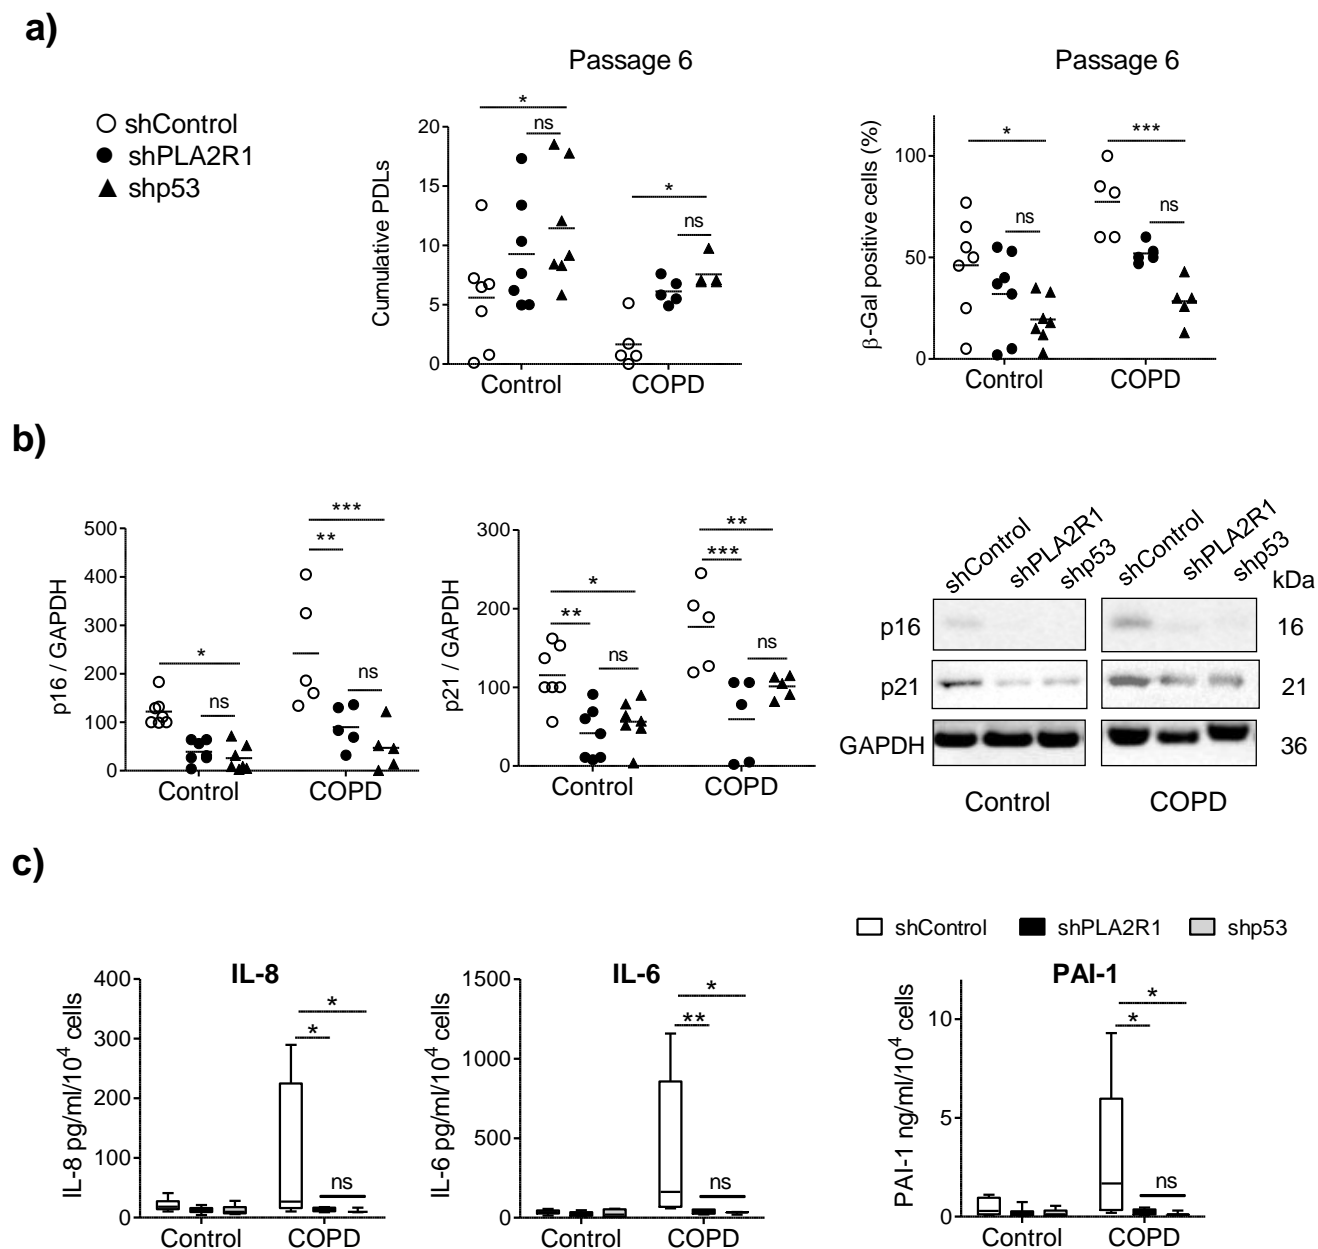

## Supplemental Figure 3

Comparison between inactivation of *PLA2R1* and *p53* in cells from patients with COPD and controls

Cells from patients with COPD (n=5) and controls (n=5) were infected either with a retroviral vector encoding an shRNA that targeted *PLA2R1* (shPLA2R1) or *p53* (shp53) or with a control vector encoding a scramble sequence (shControl). The cells were then subjected to successive passages. **(a, b)** Graphs showing cumulative numbers of PDLs, percentage of β-Gal-positive cells, and p16 and p21 protein levels as assessed by Western blotting, all determined at passage 6 are shown as individual values with the mean. Representative immunoblots are shown on the right. \* $P < 0.05$ , \*\* $P < 0.01$ , \*\*\* $P < 0.001$  vs. shControl, two-way ANOVA with Bonferroni's multiple comparisons test. **(c)** Protein levels of IL-8, IL-6, and PAI-1 in PA-SMC-conditioned media at passage 6. Data are shown as median (interquartile range) of 5 values per group. Bars represent extreme values. There were no significant differences between values recorded in cells treated with the shPLA2R1 or the shp53 vectors. \* $P < 0.05$ , \*\* $P < 0.01$  vs. shControl one-tailed Mann Whitney test.

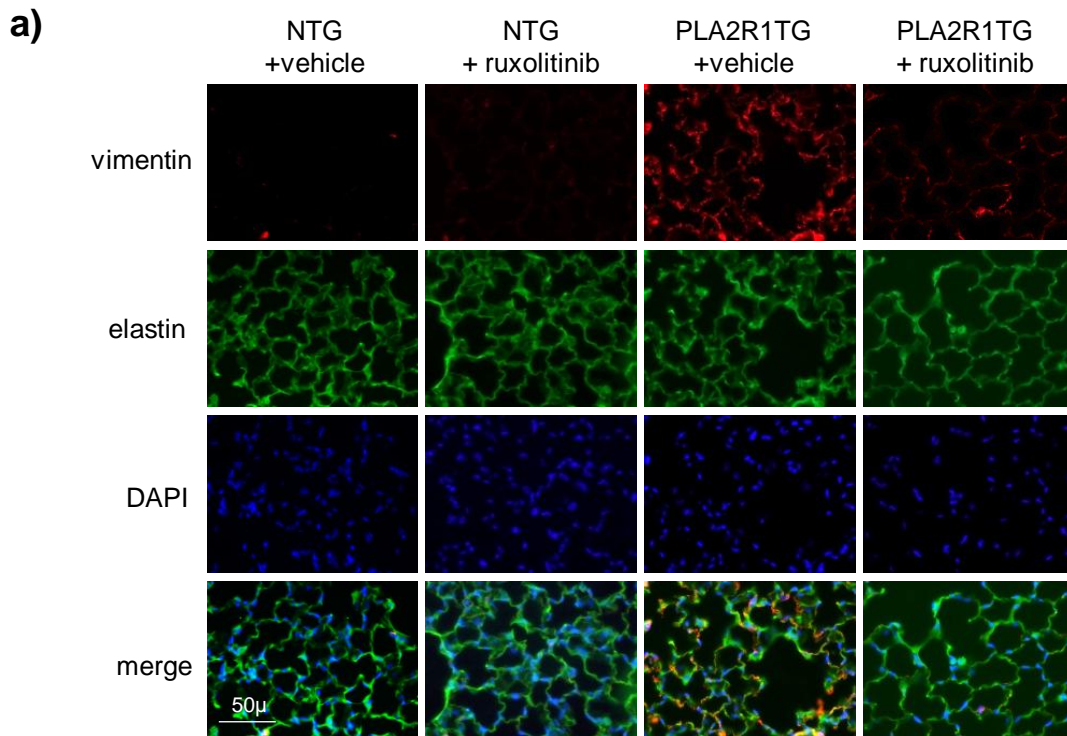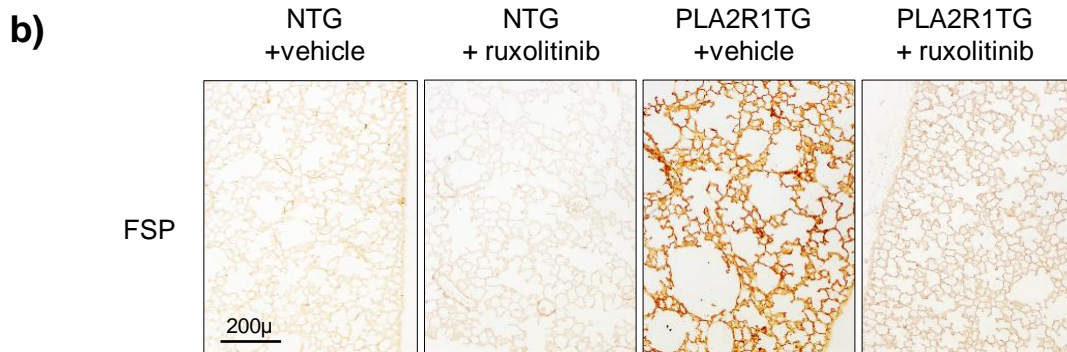

#### Supplemental Figure 4

**Lung vimentin and fibroblast-specific protein (FSP) immunostaining in *PLA2R1TG* mice and littermate controls subjected to 15 days of treatment with ruxolitinib or vehicle.**

**(a)** Representative micrographs showing lung sections stained for vimentin (red), a lung alveolar fibroblast marker, in *PLA2R1-TG* and control mice treated with ruxolitinib or vehicle. Elastin autofluorescence (green); the nuclei were stained with DAPI (blue). **(b)** Representative micrographs showing lung sections stained for fibroblast-specific protein (FSP, brown), a lung alveolar fibroblast marker, in the same groups of mice.

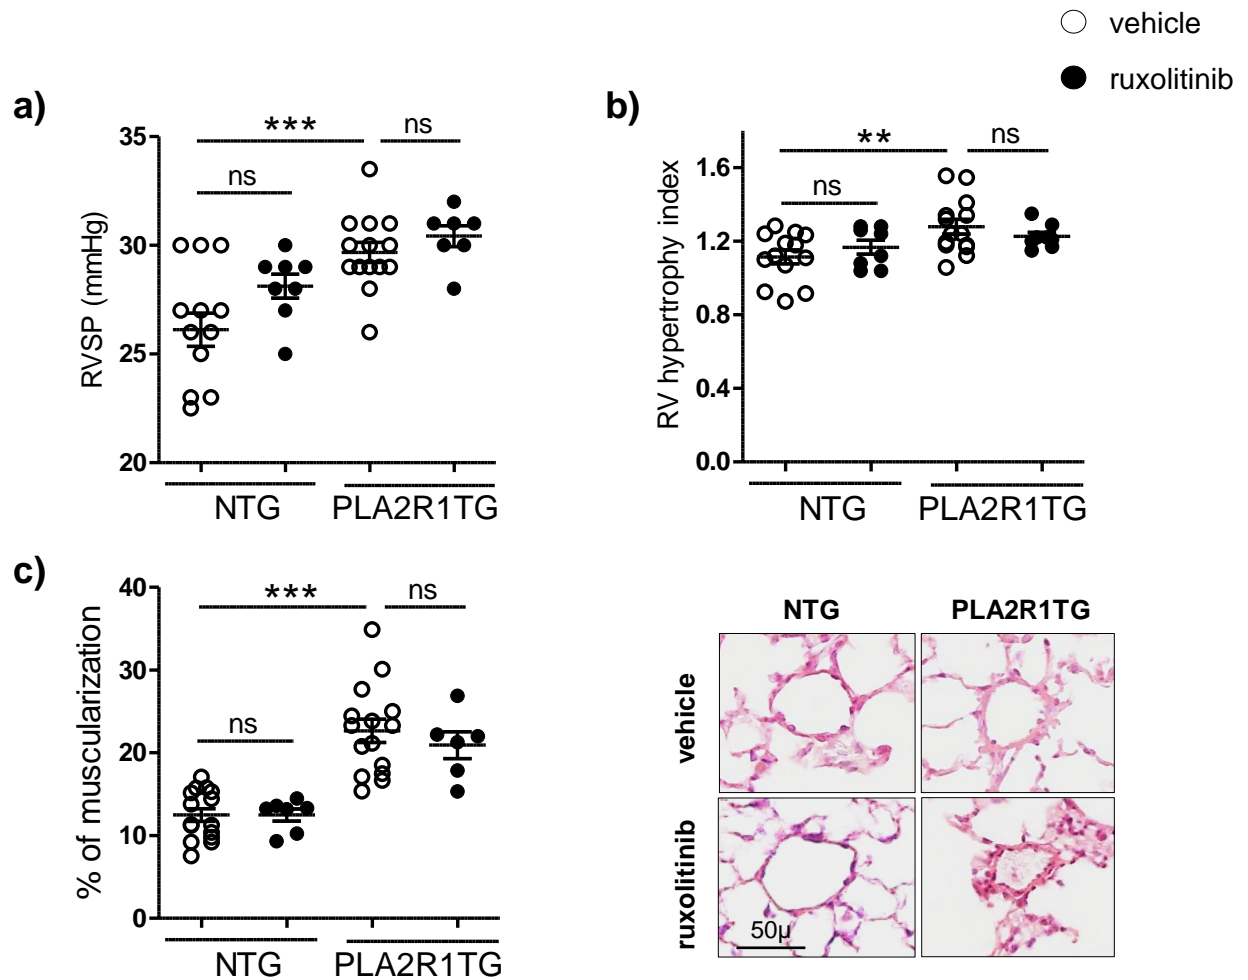

**Supplemental Figure 5. Pulmonary hemodynamic parameters in *PLA2R1TG* and littermate control (NTG) mice subjected to 15 days of treatment with ruxolitinib or vehicle**

**(a)** Right ventricular systolic pressure (RVSP) **(b)** Right ventricular hypertrophy index (Fulton's index) **(c)** Muscularization of pulmonary vessels (percent of muscularized vessels over the total number of pulmonary vessels) and representative images of pulmonary vessels. Graphs represent individual values with the mean $\pm$ SEM. \*\* $P < 0.01$ , \*\*\* $P < 0.001$  for comparisons between groups as indicated. Unpaired Student's *t*-test and two-way ANOVA with Bonferroni's multiple comparisons test.

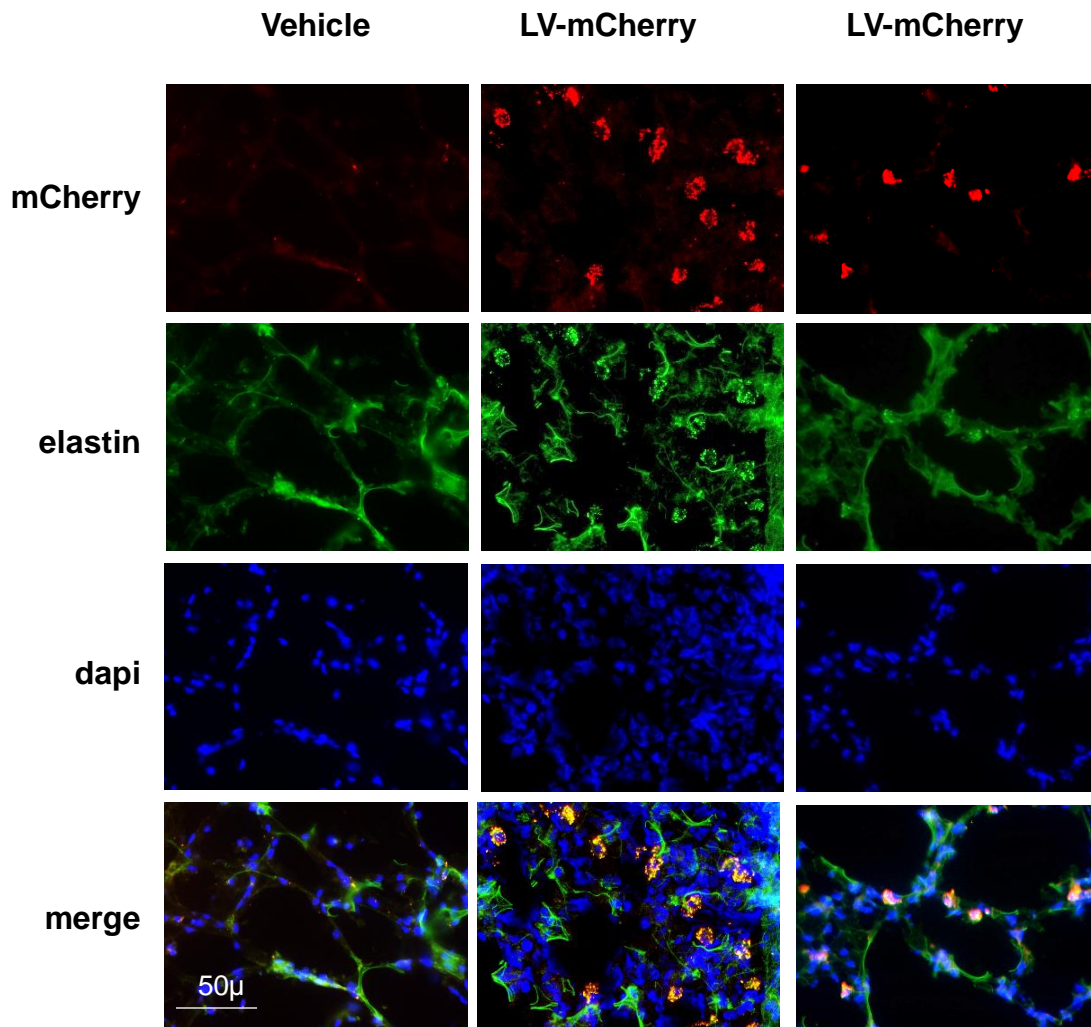

**Supplemental figure 6. Identification of lentivirus-transduced cells in the mouse lung.**

A lentiviral vector encoding the mCherry gene under the control of the CMV promoter (LV-mCherry) was injected intratracheally to mice (109 TU/ml diluted in DPBS with 5% of Lipofectamine 2000) in comparison with vehicle (DPBS with 5% of Lipofectamine 2000). Mice were sacrificed on day 9 post-infection, and lung cryosections were assessed by fluorescence microscopy for mCherry reporter gene expression (red). Green – elastin autofluorescence, nuclei were stained with DAPI (blue). Bar – 50µm.

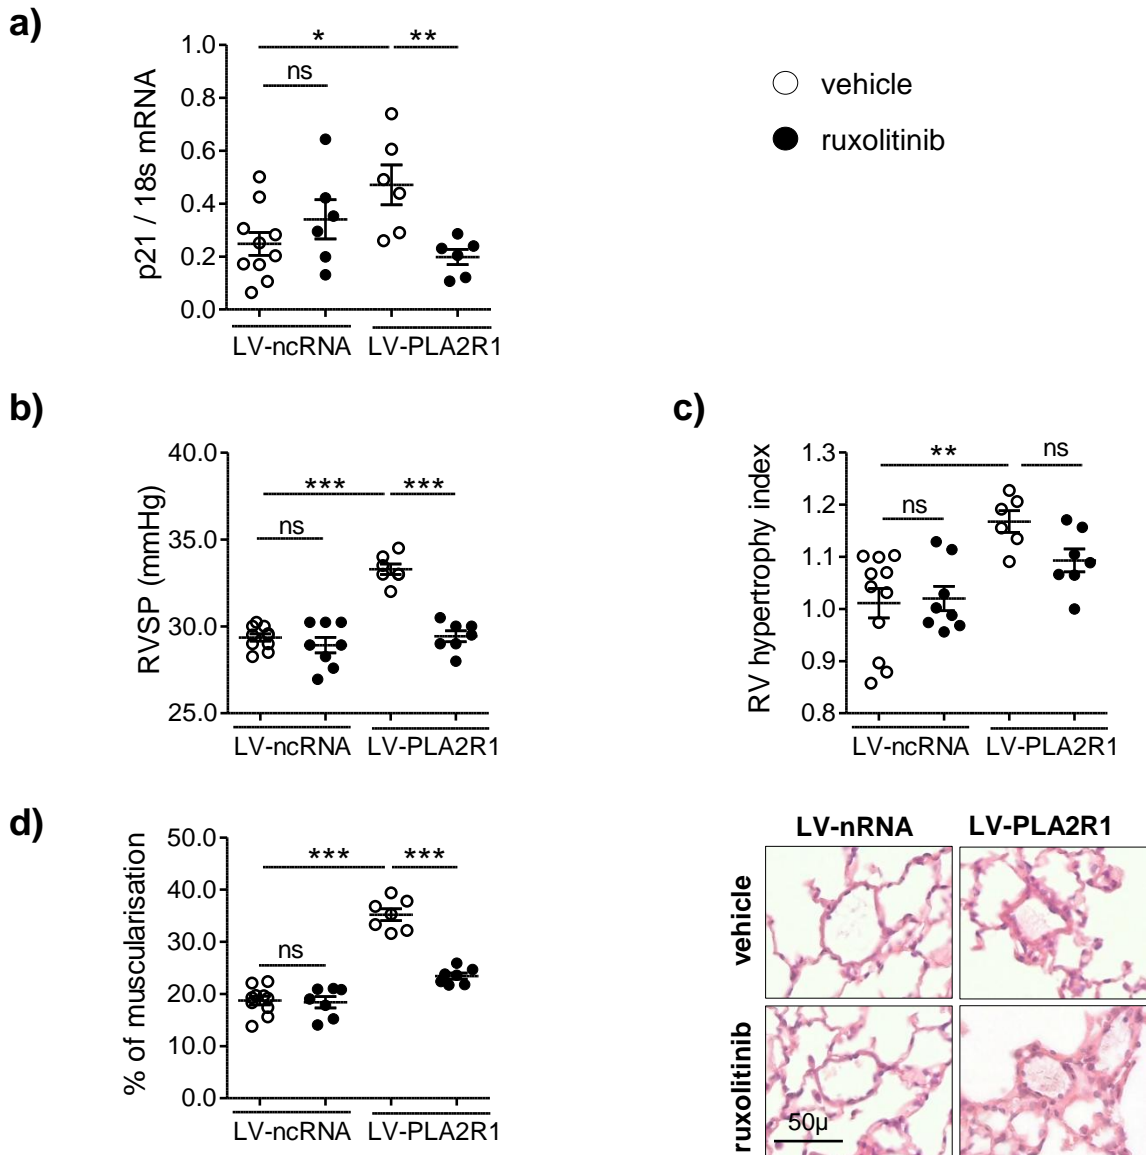

## Supplemental Figure 6

**Pulmonary hemodynamic parameters in mice subjected to an intratracheal injection of a lentivirus encoding the mouse *Pla2r1* gene (LV-PLA2R1) and concomitantly treated with ruxolitinib**

Mice treated with the LV-PLA2R1 or a control vector (LV-ncRNA) and simultaneously treated with ruxolitinib (75 mg/kg/day) or vehicle were studied 30 days after the injection. **(a)** Lung mRNA level of p21 **(b)** Right ventricular systolic pressure (RVSP) **(c)** Right ventricular hypertrophy index (Fulton's index) **(d)** Muscularization of pulmonary vessels (percent of muscularized vessels over the total number of pulmonary vessels) and representative images of pulmonary vessels. Graphs represent individual values with the mean $\pm$ SEM. \*\* $P$ <0.01, \*\*\* $P$ <0.001 for comparisons between groups as indicated. Student's *t*-test and two-way ANOVA with Bonferroni's multiple comparisons test.

**Table S1**

|             | Control |            | COPD  |            |
|-------------|---------|------------|-------|------------|
|             | Mean    | <i>sem</i> | Mean  | <i>sem</i> |
| n           | 23      |            | 23    |            |
| Age, yr     | 65,17   | ±2,60      | 59,83 | ±1,27      |
| FEV %       | 92,39   | ±2,20      | 77,78 | ±3,43      |
| FVC%        | 96,23   | ±2,98      | 88,73 | ±5,10      |
| FEV /FVC, % | 82,74   | ±1,89      | 66,05 | ±1,13      |
| Pack-years  | 25,74   | ±4,76      | 44,76 | ±5,23      |

**Table S2**

|            | Control |            | COPD   |            |
|------------|---------|------------|--------|------------|
|            | Mean    | <i>sem</i> | Mean   | <i>sem</i> |
| n          | 10      |            | 8      |            |
| Age, yr    | 62,72   | ±4,27      | 64,7   | ±2,32      |
| FEV %      | 94,38   | ±2,73      | 69,78* | ±3,23      |
| FVC%       | 101,17  | ±1,69      | 80,67  | ±5,97      |
| FEV/FVC,%  | 83,85   | ±3,30      | 62,2** | ±2,25      |
| Pack-years | 19      | ±5,39      | 52,78* | ±6,67      |

**Supplemental Tables S1 and S2**

Clinical features and pathological variables of patients with COPD and control smokers. Table S1 describes all patients and controls from whom lung samples were obtained. Cells were collected from a subset of 8 patients and 10 controls, whose characteristics are described in Table S2.

Abbreviations: FEV<sub>1</sub>, forced expiratory volume in 1 second; FEV<sub>1</sub>%, percentage of the predicted FEV<sub>1</sub> value; FVC, forced vital capacity; FVC%, percentage of the predicted FVC value.



**Table S3 : TaqMan Gene Expression assays**

| <b>Target Gene</b> | <b>Assay ID</b> |
|--------------------|-----------------|
| <b>hPLA2R1</b>     | Hs01073364_m1   |
| <b>mPLA2R1</b>     | Mm0476896_m1    |
| <b>p21</b>         | Mm04205640_g1   |
| <b>Tap1</b>        | Mm00443188_m1   |
| <b>SOCS1</b>       | Mm00782550_s1   |
| <b>Irf7</b>        | Mm00516793_g1   |
| <b>Col1a1</b>      | Mm00801666_g1   |
| <b>Col1a2</b>      | Mm00483888_m1   |
| <b>Col3a1</b>      | Mm00802300_m1   |
| <b>Acta2</b>       | Mm00725412_s1   |
| <b>Fibronectin</b> | Mm01256744_m1   |

| <b>Reference Gene</b> | <b>Assay ID</b> |
|-----------------------|-----------------|
| <b>hSF3A1</b>         | Hs01066327_m1   |
| <b>m18s</b>           | Mm03928990_g1   |
