# Supplementary material
Source: HighWire-hosted journal article supplement (https://erj.ersjournals.com/content/58/2/2000752)
Supplement: inline-supplementary-material-3 [file inline-supplementary-material-3.pdf]

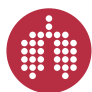

# Phospholipase A2 receptor 1 promotes lung cell senescence and emphysema in obstructive lung disease

SHAREABLE PDF

Delphine Beaulieu<sup>1,6</sup>, Aya Attwe<sup>1,2,6</sup>, Marielle Breau<sup>1</sup>, Larissa Lipskaia<sup>1</sup>, Elisabeth Marcos<sup>1</sup>, Emmanuelle Born<sup>1</sup>, Jin Huang<sup>1</sup>, Shariq Abid<sup>1</sup>, Geneviève Derumeaux<sup>1</sup>, Amal Houssaini<sup>1</sup>, Bernard Maitre<sup>1</sup>, Marine Lefevre<sup>3</sup>, Nora Vienney<sup>1</sup>, Philippe Bertolino<sup>4</sup>, Sara Jaber<sup>4</sup>, Hiba Noureddine<sup>2</sup>, Delphine Goehrig<sup>4</sup>, David Vindrieux<sup>4</sup>, David Bernard<sup>4,7</sup> and Serge Adnot<sup>1,5,7</sup>

<sup>1</sup>INSERM U955, Département de Physiologie-Explorations Fonctionnelles and DHU A-TVH Hôpital Henri Mondor, AP-HP, Créteil, France. <sup>2</sup>Environmental Health Research Laboratory (EHRL), Faculty of Sciences V, Lebanese University, Nabatieh, Lebanon. <sup>3</sup>Département Anatomopathologie, Institut Mutualiste Montsouris, Paris, France. <sup>4</sup>Centre de Recherche en Cancérologie de Lyon, UMR INSERM U1052/CNRS 5286, Université de Lyon, Centre Léon Bérard, Lyon, France. <sup>5</sup>Institute for Lung Health, University of Giessen, Giessen, Germany. <sup>6</sup>These two authors contributed equally. <sup>7</sup>These two authors are joint senior authors.

Corresponding author: Serge Adnot ([serge.adnot@inserm.fr](mailto:serge.adnot@inserm.fr))

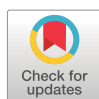

Shareable abstract (@ERSpublications)

**PLA2R1 is a potent regulator of lung cell senescence in COPD, with JAK/STAT signalling as a major effector. Inhibition of JAK1/2 attenuates PLA2R1-induced lung alterations in murine models and so may represent a promising therapeutic approach for COPD.** <http://bit.ly/3i7yT3H>

**Cite this article as:** Beaulieu D, Attwe A, Breau M, *et al.* Phospholipase A2 receptor 1 promotes lung cell senescence and emphysema in obstructive lung disease. *Eur Respir J* 2021; 58: 2000752 [DOI: 10.1183/13993003.00752-2020].

This single-page version can be shared freely online.

Copyright ©The authors 2021. For reproduction rights and permissions contact [permissions@ersnet.org](mailto:permissions@ersnet.org)

This article has supplementary material available from [erj.ersjournals.com](http://erj.ersjournals.com)

Received: 18 March 2020  
Accepted: 28 Dec 2020

## Abstract

**Background** Cell senescence is a key process in age-associated dysfunction and diseases, notably chronic obstructive pulmonary disease (COPD). We previously identified phospholipase A2 receptor 1 (PLA2R1) as a positive regulator of cell senescence acting *via* Janus kinase (JAK)/signal transducer and activator of transcription (STAT) signalling. Its role in pathology, however, remains unknown. Here, we assessed PLA2R1-induced senescence in COPD and lung emphysema pathogenesis.

**Methods** We assessed cell senescence in lungs and cultured lung cells from patients with COPD and controls subjected to *PLA2R1* knockdown, *PLA2R1* gene transduction and treatment with the JAK1/2 inhibitor ruxolitinib. To assess whether *PLA2R1* upregulation caused lung lesions, we developed transgenic mice overexpressing *PLA2R1* (*PLA2R1*-TG) and intratracheally injected wild-type mice with a lentiviral vector carrying the *Pla2r1* gene (LV-*PLA2R1* mice).

**Results** We found that *PLA2R1* was overexpressed in various cell types exhibiting senescence characteristics in COPD lungs. *PLA2R1* knockdown extended the population doubling capacity of these cells and inhibited their pro-inflammatory senescence-associated secretory phenotype (SASP). *PLA2R1*-mediated cell senescence in COPD was largely reversed by treatment with the potent JAK1/2 inhibitor ruxolitinib. Five-month-old *PLA2R1*-TG mice exhibited lung cell senescence, and developed lung emphysema and lung fibrosis together with pulmonary hypertension. Treatment with ruxolitinib induced reversal of lung emphysema and fibrosis. LV-*PLA2R1*-treated mice developed lung emphysema within 4 weeks and this was markedly attenuated by concomitant ruxolitinib treatment.

**Conclusions** Our data support a major role for *PLA2R1* activation in driving lung cell senescence and lung alterations in COPD. Targeting JAK1/2 may represent a promising therapeutic approach for COPD.
